# Supplementary material for: Rabphilin 3A binds the N-peptide of SNAP-25 to promote SNARE complex assembly in exocytosis
Source: eLife. 2022 Sep 29;11:e79926. doi: 10.7554/eLife.79926 (PMC9522249; doi:10.7554/eLife.79926)
Supplement: Figure 1—figure supplement 2—source data 2. [file elife-79926-fig1-figsupp2-data2.xlsx]

## Sheet: 1B
			GST-SN25
		Rph3A (μM)						Mean	SD	SEM
		0	0	0	0	0		0	0	0
		0.5	0.141849	0.1375	0.0919118	0.133333		0.126149	0.0230879	0.011544
		1	0.274653	0.178241	0.164474	0.246154		0.21588	0.0530099	0.026505
		2	0.326415	0.468585	0.292969	0.36		0.361992	0.0761491	0.0380746
		3	0.575919	0.627717	0.683594	0.5184		0.601408	0.0706793	0.0353396
		4	0.61966	0.736728	0.8125	0.664615		0.708376	0.0845205	0.0422603
		6	0.915408	0.81375	0.952744	0.981818		0.91593	0.0733429	0.0366715
		8	1.1803	0.985976	0.958807	0.996923		1.0305	0.101142	0.0505708
		10	1	1	1	1		1	0	0
