# Supplementary material for: Rabphilin 3A binds the N-peptide of SNAP-25 to promote SNARE complex assembly in exocytosis
Source: eLife. 2022 Sep 29;11:e79926. doi: 10.7554/eLife.79926 (PMC9522249; doi:10.7554/eLife.79926)
Supplement: Figure 1—figure supplement 3—source data 2. [file elife-79926-fig1-figsupp3-data2.xlsx]

## Sheet: 2B
	GST-SN25			GST-SN25				GST-SN25			GST-SN25
								Mean	SD	SEM	Mean	SD	SEM
Rph3A Δ185-371	100	100	100	1.07036	3.3218	2.19608		100	0	0	2.19608	1.12572	1.73205
Rph3A Δ185-371 GLAA	16.5472	20.8139	18.6806	1.62831	3.58621	2.60726		18.6806	2.1334	1.23172	2.60726	0.97895	1.73205
