# Supplementary material for: Rabphilin 3A binds the N-peptide of SNAP-25 to promote SNARE complex assembly in exocytosis
Source: eLife. 2022 Sep 29;11:e79926. doi: 10.7554/eLife.79926 (PMC9522249; doi:10.7554/eLife.79926)
Supplement: Figure 1—source data 2. [file elife-79926-fig1-data2.xlsx]

## Sheet: 1C
		GST-SN25			GST				GST-SN25			GST
									Mean	SD	SEM	Mean	SD	SEM
	FL	100	100	100	3.68287	2.25914	2.971		100	0	0	2.971	0.711869	0.410998
	1-281	0.725414	1.70043	1.21292	4.34152	0	2.17076		1.21292	0.487505	0.281461	2.17076	2.17076	1.25329
	182-681	18.6425	17.3568	17.9996	3.98978	1.66463	2.8272		17.9996	0.642865	0.371158	2.8272	1.16258	0.671214
	282-681	12.0194	11.4318	11.7256	3.89699	1.41196	2.65448		11.7256	0.293825	0.16964	2.65448	1.24252	0.717368
	372-681	18.8189	9.7617	14.2903	1.55383	0	0.776914		14.2903	4.52858	2.61457	0.776914	0.776914	0.448552

## Sheet: 1E
		GST-SN25			GST				GST-SN25			GST
									Mean	SD	SEM	Mean	SD	SEM
	Rph3A FL	90.3232	102.726	106.951	2.76121	22.1725	1.04862		100	8.64257	4.98979	8.66078	11.7328	6.77393
	Rph3A Δ185-371	116.726	124.165	143.023	4.93452	9.28066	12.1606		127.971	13.5553	7.82616	8.79193	3.63775	2.10026
	Rph3A Δ1-45&Δ161-371	107.15	110.624	87.1778	-3.33893	6.00235	0.809508		101.65	12.6533	7.30541	1.15764	4.68036	2.70221

## Sheet: 1H
	GST-RBD	GST-RBD GLAA	GST
	100	3.61179	1.25307
	100	6.04044	2.78986
	100	3.62123	1.39451
Mean	100	4.42449	1.81248
SD	0	1.39946	0.849387
SEM	0	0.80798	0.490394

## Sheet: 1J
	GST-SN25	GST-SN25+Rab3A Q81L	GST+Rab3A Q81L
	100	124.486	13.1661
	100	74.6698	6.48125
	100	80.637	11.1626
	100	106.689	4.92527
Mean	100	96.6204	8.93379
SD	0	23.2032	3.87139
SEM	0	11.6016	1.93569
