# Supplementary material for: Rabphilin 3A binds the N-peptide of SNAP-25 to promote SNARE complex assembly in exocytosis
Source: eLife. 2022 Sep 29;11:e79926. doi: 10.7554/eLife.79926 (PMC9522249; doi:10.7554/eLife.79926)
Supplement: Figure 2—figure supplement 1—source data 2. [file elife-79926-fig2-figsupp1-data2.xlsx]

## Sheet: 1B
	GST-SN1			GST
	WT	EDR	DER
	100	140.869	154.462	0
	100	148.397	277.449	6.30903
	100	138.644	215.956	12.1246
Mean	100	142.637	215.956	6.14455
SD	1.1547e-05	5.11126	61.4936	6.06398
SEM	6.66667e-06	2.95099	35.5033	3.50104
