# Supplementary material for: Rabphilin 3A binds the N-peptide of SNAP-25 to promote SNARE complex assembly in exocytosis
Source: eLife. 2022 Sep 29;11:e79926. doi: 10.7554/eLife.79926 (PMC9522249; doi:10.7554/eLife.79926)
Supplement: Figure 2—figure supplement 2—source data 2. [file elife-79926-fig2-figsupp2-data2.xlsx]

## Sheet: 2B
									Rph3A FL			SN25
		Rph3A FL			SN25				Mean	SD	SEM	Mean	SD	SEM
	SN25 5uM	0.757886	0.696649	0.716577	0.267176	0.290411	0.267797		0.723704	0.0312342	0.0180331	0.275128	0.0132393	0.00764374
	SN25 11-206 5uM	0.707483	0.799358	0.730419	0.0806452	0.109423	0.0954274		0.745753	0.0478185	0.027608	0.095165	0.0143905	0.00830834
