# Supplementary material for: Rabphilin 3A binds the N-peptide of SNAP-25 to promote SNARE complex assembly in exocytosis
Source: eLife. 2022 Sep 29;11:e79926. doi: 10.7554/eLife.79926 (PMC9522249; doi:10.7554/eLife.79926)
Supplement: Figure 2—source data 2. [file elife-79926-fig2-data2.xlsx]

## Sheet: 2C
	GST-SN25 FL	GST-SN25 1-140	GST-SN25 141-206	GST-SN25 83-206	GST-SN25 1-82	GST-SN25 83-140	GST
	99.8958	93.1544	8.37626	36.6813	84.7031	19.7842	17.1138
	100.06	92.3769	5.99808	13.124	69.2381	12.9034	7.51064
	99.9302	67.7033	2.98085	6.90417	79.3813	9.78091	2.23564
Mean	99.962	84.4115	5.78506	18.9032	77.7742	14.1562	8.95335
SD	0.0864715	14.475	2.70401	15.7073	7.85677	5.11796	7.54325
SEM	0.0499244	8.35712	1.56116	9.06861	4.53611	2.95485	4.3551

## Sheet: 2F
	GST-SN1 1-83	GST-SN1 7-83	GST-SN1 11-83	GST
	100	41.9355	25.8065	9.67742
	100	38.2353	20.5882	14.7059
	100	39.2857	26.1792	25
Mean	100	39.8188	24.1913	16.4611
SD	0	1.90683	3.12589	7.81063
SEM	0	1.10091	1.80474	4.50947
