# Supplementary material for: Rabphilin 3A binds the N-peptide of SNAP-25 to promote SNARE complex assembly in exocytosis
Source: eLife. 2022 Sep 29;11:e79926. doi: 10.7554/eLife.79926 (PMC9522249; doi:10.7554/eLife.79926)
Supplement: Figure 3—source data 2. [file elife-79926-fig3-data2.xlsx]

## Sheet: 3C
		control	SN25 KD	SN25 1-206	SN25 11-206
		0.317119	0.0559327	0.382547	0.243362
		0.949281	0.261506	0.569238	0.211149
		0.83172	0.187836	0.268607	0.162176
		0.399579	0.195157	0.489783	0.316034
		0.332406	0.110124	0.348465	0.249004
		0.300048	0.232951	0.589187	0.255642
		0.341355	0.164599	0.809548	0.207175
		0.663255	0.384233	0.366487	0.342862
		0.435079	0.323862	0.360286	0.290966
			0.297211	0.475044	0.206437
			0.300204	1.13843	0.295612
				0.216967
				0.536118
				0.314255
	Mean	0.50776	0.228511	0.490355	0.252765
	SD	0.244689	0.0974472	0.241653	0.0544881
	SEM	0.0815631	0.0293814	0.0645845	0.0164288

## Sheet: 3D
	control
Time(s)											Mean	SD	SEM
0	0	0	0	0	0	0	0	0			0	0	0
10	0.0114051	0.0133713	0.0340488	0.0203741	0.00708684	0.00607095	0.0237433	0.0468825			0.0203729	0.0142009	0.00502078
20	0.0250912	0.0230959	0.0710585	0.0346359	0.00944912	0.0121419	0.028492	0.0703238			0.034286	0.0239094	0.00845325
30	0.0342153	0.0376828	0.0932643	0.044823	0.0188982	0.0242838	0.0379893	0.0843885			0.0469431	0.0272034	0.00961786
40	0.0501825	0.0437607	0.111029	0.0488978	0.0236228	0.0323784	0.042738	0.087514			0.0550154	0.0293496	0.0103766
50	0.0638686	0.0534853	0.128794	0.0590848	0.0259851	0.040473	0.0522353	0.0922022			0.064516	0.0322119	0.0113886
60	0.0707117	0.0607787	0.149519	0.0631596	0.0401587	0.0445203	0.0569839	0.0953278			0.072645	0.0353558	0.0125002
70	0.0752737	0.0692878	0.164323	0.0692718	0.0448833	0.0607095	0.0569839	0.0984533			0.0798983	0.037489	0.0132544
80	0.0821168	0.0741501	0.173205	0.0774215	0.0519701	0.0728514	0.0617326	0.103141			0.0870736	0.0378686	0.0133886
90	0.0843978	0.0753657	0.180607	0.0794589	0.0519701	0.0768987	0.0617326	0.104704			0.0893919	0.0399938	0.0141399
100	0.0889598	0.0765812	0.19245	0.0916833	0.0566947	0.0789223	0.0664813	0.104704			0.0945596	0.042283	0.0149493
110	0.0912409	0.0790124	0.201332	0.10187	0.0614193	0.080946	0.0712299	0.104704			0.0989694	0.0438859	0.015516
120	0.0912409	0.0814435	0.205773	0.105945	0.0637815	0.0890406	0.0759786	0.104704			0.102239	0.0441352	0.0156041
130	0.0935219	0.0850902	0.214656	0.114095	0.0661438	0.0930879	0.0759786	0.104704			0.10591	0.0464799	0.0164331
140	0.0958029	0.0875214	0.220577	0.11817	0.0661438	0.0991588	0.0759786	0.104704			0.108507	0.0481211	0.0170134
150	0.0958029	0.0948148	0.226499	0.126319	0.0732306	0.103206	0.0759786	0.104704			0.112569	0.0489917	0.0173212
160	0.0958029	0.0948148	0.23242	0.130394	0.0732306	0.107253	0.0759786	0.104704			0.114325	0.0510325	0.0180427
170	0.0980839	0.0948148	0.238342	0.132431	0.0779552	0.107253	0.0759786	0.104704			0.116195	0.0524544	0.0185454
180	0.0980839	0.0960304	0.238342	0.132431	0.0826798	0.107253	0.0759786	0.104704			0.116938	0.0519152	0.0183548
	SN25 KD
Time(s)											Mean	SD	SEM
0	0	0	0	0	0	0					0	0	0
10	0.0051458	0.00345411	0.0120958	0.00349321	0.00322831	0.00173034					0.00485792	0.00370783	0.00151372
20	0.0102916	0.00690821	0.0172797	0.00698641	0.00403538	0.00173034					0.00787194	0.00544999	0.00222495
30	0.0137221	0.0189976	0.0259196	0.00960632	0.00807076	0.00346069					0.0132962	0.00812027	0.00331509
40	0.0171527	0.0276329	0.0293755	0.0113529	0.00968492	0.00346069					0.0164433	0.0103256	0.0042154
50	0.0308748	0.0379952	0.0362874	0.0113529	0.0121061	0.00346069					0.0220129	0.0147898	0.00603791
60	0.0343053	0.0449034	0.0431993	0.0122262	0.0137203	0.00346069					0.0253025	0.0177073	0.00722897
70	0.0428817	0.0569928	0.0483832	0.0130995	0.0153344	0.00346069					0.0300254	0.0220795	0.00901392
80	0.0445969	0.0621739	0.0483832	0.0139728	0.0161415	0.00519103					0.0317432	0.0229449	0.00936723
90	0.0480274	0.0673551	0.0518391	0.0148461	0.0169486	0.00692137					0.034323	0.0245675	0.0100296
100	0.0480274	0.0690821	0.055295	0.0148461	0.0169486	0.00692137					0.0351868	0.0255477	0.0104298
110	0.0531732	0.0742633	0.058751	0.0157194	0.0169486	0.00692137					0.0376295	0.0278586	0.0113732
120	0.0566038	0.0777174	0.060479	0.017466	0.0169486	0.00692137					0.039356	0.0291497	0.0119003
130	0.0600343	0.0794445	0.0622069	0.0192126	0.0169486	0.00692137					0.0407947	0.0300142	0.0122533
140	0.0600343	0.0811715	0.0622069	0.0200859	0.0169486	0.00692137					0.0412281	0.0303404	0.0123864
150	0.0617496	0.0811715	0.0639349	0.0200859	0.0169486	0.00692137					0.041802	0.0308015	0.0125747
160	0.0634648	0.0811715	0.0656629	0.0200859	0.0169486	0.00692137					0.0423759	0.0312811	0.0127705
170	0.0651801	0.0811715	0.0673909	0.0218325	0.0169486	0.00692137					0.0432408	0.0315341	0.0128737
180	0.0651801	0.0811715	0.0691188	0.0227058	0.0169486	0.00692137					0.0436744	0.0316881	0.0129366
	SN25 1-206
Time(s)											Mean	SD	SEM
0	0	0	0	0	0	0	0	0			0	0	0
10	0.018315	0.0289736	0.0201613	0.0242961	0.0212258	0.00643304	0.00410206	0.00773498			0.0164052	0.00915898	0.00323819
20	0.039072	0.0564222	0.0423387	0.06209	0.0495268	0.00964956	0.0136735	0.014365			0.0358922	0.0206714	0.00730844
30	0.0647131	0.0747213	0.0574597	0.0863861	0.0636774	0.0225156	0.0191429	0.0265199			0.051892	0.025703	0.00908738
40	0.0769231	0.0960703	0.0725806	0.113382	0.0760591	0.0337735	0.0191429	0.0320449			0.064997	0.033364	0.0117959
50	0.0952381	0.103695	0.0826613	0.129579	0.0919784	0.0418148	0.023245	0.0397799			0.0759989	0.0369771	0.0130734
60	0.112332	0.125044	0.0897177	0.140377	0.102591	0.0514643	0.0246124	0.0475149			0.0867067	0.0412346	0.0145786
70	0.120879	0.135718	0.0927419	0.151176	0.107898	0.0595056	0.0300818	0.0508299			0.0936038	0.0432014	0.015274
80	0.129426	0.138768	0.102823	0.153875	0.111435	0.0659387	0.0314491	0.0563548			0.0987588	0.0433624	0.0153309
90	0.136752	0.144868	0.108871	0.159274	0.113204	0.07398	0.0382859	0.0574598			0.104087	0.043576	0.0154064
100	0.140415	0.147918	0.111895	0.172772	0.114973	0.0755882	0.0410206	0.0596698			0.108031	0.045944	0.0162437
110	0.147741	0.163167	0.115927	0.180871	0.118511	0.0771965	0.0410206	0.0629848			0.113427	0.0497595	0.0175926
120	0.153846	0.169267	0.121976	0.191669	0.120279	0.0820213	0.0423879	0.0685098			0.118745	0.0518485	0.0183312
130	0.153846	0.176891	0.127016	0.191669	0.120279	0.0820213	0.0437553	0.0740348			0.121189	0.051996	0.0183834
140	0.156288	0.178416	0.134073	0.191669	0.120279	0.0852378	0.0492247	0.0773498			0.124067	0.0506643	0.0179125
150	0.159951	0.179941	0.137097	0.191669	0.120279	0.086846	0.0519594	0.0773498			0.125637	0.0505844	0.0178843
160	0.161172	0.187566	0.140121	0.194369	0.120279	0.086846	0.0519594	0.0784548			0.127596	0.0523574	0.0185111
170	0.166056	0.193665	0.143145	0.194369	0.120279	0.0884543	0.0546941	0.0784548			0.12989	0.0532082	0.0188119
180	0.167277	0.193665	0.143145	0.194369	0.120279	0.0900626	0.0546941	0.0828748			0.130796	0.0525564	0.0185815
	SN25 11-206
Time(s)											Mean	SD	SEM
0	0	0	0	0	0	0	0	0	0		0	0	0
10	0.00975039	0.00781629	0.00272424	0.000743456	0.0064433	0.00316096	0.00245477	0.00591203	0.000769041		0.00441939	0.00319055	0.00106352
20	0.0146256	0.0234489	0.00408636	0.00223037	0.0128866	0.00948287	0.00981908	0.00591203	0.00230712		0.0094221	0.00688408	0.00229469
30	0.0146256	0.0250121	0.00544848	0.00223037	0.0193299	0.0126438	0.00981908	0.00985338	0.00307617		0.0113377	0.00753135	0.00251045
40	0.0195008	0.0312651	0.0068106	0.00371728	0.0225516	0.0158048	0.00981908	0.0157654	0.00461425		0.0144277	0.009146	0.00304867
50	0.0219384	0.0343917	0.00817272	0.00520419	0.0225516	0.0189657	0.00981908	0.0177361	0.00692137		0.016189	0.0095287	0.00317623
60	0.0268136	0.0375182	0.00817272	0.00594765	0.0257732	0.0221267	0.00981908	0.0216774	0.00769041		0.0183932	0.0109731	0.0036577
70	0.0316888	0.0375182	0.010897	0.00966492	0.0257732	0.0252876	0.00981908	0.0256188	0.0092285		0.0206107	0.0108534	0.0036178
80	0.0341264	0.0437712	0.0122591	0.0118953	0.0289948	0.0252876	0.00981908	0.0275895	0.0092285		0.0225524	0.0123377	0.00411255
90	0.0390016	0.0453345	0.0136212	0.0126388	0.0289948	0.0252876	0.00981908	0.0295601	0.00999754		0.0238061	0.0130927	0.00436424
100	0.0463143	0.0468977	0.0149833	0.0126388	0.0322165	0.0252876	0.00981908	0.0315308	0.0115356		0.0256915	0.014531	0.00484367
110	0.0463143	0.048461	0.0190697	0.0133822	0.0322165	0.0252876	0.00981908	0.0354722	0.0115356		0.0268398	0.0146542	0.00488475
120	0.0511896	0.048461	0.0190697	0.0141257	0.0354381	0.0252876	0.0122738	0.0394135	0.0130737		0.0287036	0.0153593	0.00511975
130	0.0536271	0.0531507	0.0190697	0.0141257	0.0354381	0.0252876	0.0122738	0.0394135	0.0146118		0.0296665	0.0164167	0.00547224
140	0.0560647	0.054714	0.0190697	0.0156126	0.0354381	0.0252876	0.0122738	0.0394135	0.0146118		0.0302762	0.0169829	0.00566096
150	0.0585023	0.0562773	0.0190697	0.0170995	0.0354381	0.0252876	0.0122738	0.0433549	0.0161499		0.0314948	0.0176948	0.00589826
160	0.0609399	0.0625303	0.0190697	0.0178429	0.0354381	0.0252876	0.0122738	0.0453255	0.0161499		0.032762	0.0193869	0.00646229
170	0.0633775	0.0656568	0.0190697	0.0178429	0.0354381	0.0252876	0.0122738	0.0453255	0.017688		0.0335511	0.0202845	0.00676151
180	0.0706903	0.0672201	0.0204318	0.0178429	0.0354381	0.0252876	0.0122738	0.0453255	0.018457		0.0347741	0.0218213	0.00727377

## Sheet: 3E
	Control	SN25 KD	SN25 WT	SN25 11-206
	0.0980839	0.0651801	0.167277	0.0706903
	0.0960304	0.0811715	0.193665	0.0672201
	0.238342	0.0691188	0.143145	0.0204318
	0.132431	0.0227058	0.194369	0.0178429
	0.0826798	0.0169486	0.120279	0.0354381
	0.107253	0.00692137	0.0900626	0.0252876
	0.0759786		0.0546941	0.0122738
	0.104704		0.0828748	0.0453255
				0.018457
Mean	0.116938	0.0436744	0.130796	0.312967
SD	0.0519152	0.0316881	0.0525564	0.0218213
SEM	0.0183548	0.0129366	0.0185815	0.00727377
