# Supplementary material for: Rabphilin 3A binds the N-peptide of SNAP-25 to promote SNARE complex assembly in exocytosis
Source: eLife. 2022 Sep 29;11:e79926. doi: 10.7554/eLife.79926 (PMC9522249; doi:10.7554/eLife.79926)
Supplement: Figure 4—figure supplement 1—source data 2. [file elife-79926-fig4-figsupp1-data2.xlsx]

## Sheet: 1B
	GST-SN25 1-140			GST
								Mean	SD	SEM	Mean	SD	SEM
Rph3A FL	100	100	100	3.21144	10.2468	0		100	0	0	4.48609	5.24099	3.02589
Rph3A K4	40.6137	107.933	93.0674	1.86343	3.17569	0		80.5379	35.3653	20.4182	1.67971	1.5958	0.921335
Rph3A K3	17.8775	4.69413	42.9018	0.687642	6.41142	2.59947		21.8245	19.4072	11.2048	3.23284	2.91398	1.68239
