# Supplementary material for: Rabphilin 3A binds the N-peptide of SNAP-25 to promote SNARE complex assembly in exocytosis
Source: eLife. 2022 Sep 29;11:e79926. doi: 10.7554/eLife.79926 (PMC9522249; doi:10.7554/eLife.79926)
Supplement: Figure 4—source data 2. [file elife-79926-fig4-data2.xlsx]

## Sheet: 4C
	GST-SN25 1-82			GST
								Mean	SD	SEM	Mean	SD	SEM
Rph3A FL	100	100	100	0	7.22557	1.63599		100	1.1547e-05	6.66667e-06	2.95385	3.78877	2.18745
Rph3A K4	81.2878	68.1681	70.6169	0	8.10284	1.97824		73.3576	6.97606	4.02763	3.36036	4.22454	2.43904
Rph3A K3	3.84615	22.112	18.3333	7.87798	8.62745	10.9966		14.7638	9.6419	5.56675	9.16733	1.62788	0.939855

## Sheet: 4F
	control	Rph3A KD	Rph3A	Rph3A K3	Rph3A GLAA
	0.298509	0.28985	0.436872	0.326205	0.0485639
	0.171571	0.272973	0.423637	0.173684	0.137806
	0.253749	0.237036	0.374331	0.156989	0.182157
	0.269137	0.307613	0.12059	0.133116	0.0598639
	0.320251	0.203124	0.138048	0.0643397	0.0824594
	0.528033	0.160917	0.502707	0.214819	0.293873
	0.197678	0.12252	0.320555	0.19371	0.160049
	0.354708	0.346806	0.235755	0.169751	0.34035
	0.540884	0.257108	0.180342	0.17211	0.229042
	0.169121	0.250585	0.311313	0.18772	0.111659
	0.306562	0.255549	0.32218	0.176931	0.194298
	0.254244	0.128308	0.316186	0.123326	0.419851
	0.300497	0.110532	0.22197	0.110617	0.134015
	0.258555	0.263012	0.329515		0.324235
	0.235024	0.118715	0.355389		0.102642
	0.357078	0.0755065	0.289994		0.331446
	0.368257	0.322612	0.0934662		0.0718821
	0.154878	0.121122	0.670076		0.324302
	0.641501	0.0853743	0.277096		0.256256
	0.837173	0.0620655	0.189516		0.208572
	0.356896	0.373893	0.276769
		0.0655961
		0.0663068
Mean	0.341634	0.195527	0.30411	0.169486	0.200666
SD	0.168772	0.100613	0.134435	0.0617428	0.109864
SEM	0.0368292	0.0209793	0.0293362	0.0171244	0.0245664

## Sheet: 4G
Time(s)	control										Mean	SD	SEM
0	0	0	0	0	0	0	0	0	0		0	0	0
13	0.035395	0.0597207	0.0159994	0.0172557	0.0106995	0.026825	0.00375384	0.0217418	0.0129848		0.0227084	0.016664	0.00555467
26	0.0462858	0.116845	0.027199	0.0215696	0.0106995	0.0590149	0.0187692	0.0496956	0.034626		0.0427449	0.031965	0.010655
39	0.0490085	0.148003	0.0359986	0.0215696	0.0106995	0.0697449	0.0187692	0.0590135	0.0605956		0.0526003	0.0413104	0.0137701
52	0.0571766	0.168776	0.0383985	0.0258835	0.0122281	0.0804749	0.0337846	0.0683315	0.0649238		0.0611086	0.0460189	0.0153396
65	0.0598993	0.189548	0.0399985	0.0388252	0.0198706	0.112665	0.0525538	0.0745434	0.0692521		0.0730173	0.0510424	0.0170141
78	0.0653447	0.199934	0.0447983	0.0474531	0.0259846	0.12876	0.0600615	0.0745434	0.0735803		0.0800511	0.0532226	0.0177409
91	0.0653447	0.210321	0.0479982	0.0474531	0.0305701	0.13949	0.0600615	0.0776494	0.0865651		0.0850503	0.0564365	0.0188122
104	0.0735128	0.215514	0.0495981	0.0603948	0.0351556	0.13949	0.0900923	0.102497	0.0865651		0.0947577	0.0547217	0.0182406
117	0.0762354	0.215514	0.0495981	0.0603948	0.0412697	0.166315	0.0975999	0.111815	0.0908933		0.101071	0.0570986	0.0190329
130	0.0789582	0.220707	0.0495981	0.0819644	0.0519692	0.177045	0.0975999	0.111815	0.0908933		0.106728	0.0569455	0.0189818
143	0.0789582	0.2259	0.051198	0.107848	0.0596117	0.177045	0.105108	0.114921	0.0908933		0.112387	0.0561856	0.0187285
156	0.0816808	0.2259	0.052798	0.125104	0.0657258	0.18241	0.112615	0.114921	0.0952216		0.117375	0.0555633	0.0185211
169	0.0844035	0.2259	0.0543979	0.129417	0.0703113	0.187775	0.112615	0.114921	0.0995499		0.119921	0.0552665	0.0184222
180	0.0844035	0.2259	0.0551979	0.129417	0.0718398	0.19314	0.112615	0.114921	0.103878		0.121257	0.0556381	0.018546
Time(s)	Rph3A KD											Mean	SD	SEM
0	0	0	0	0	0	0	0	0	0	0		0	0	0
13	0	0.00244599	0	0.00807911	0.006253	0.00455805	0.00184981	0.00453214	0.00862117	0.00418796		0.00405272	0.00303151	0.000958649
26	0	0.014676	0.00820537	0.0323164	0.031265	0.0091161	0.00369963	0.00453214	0.0172423	0.00558395		0.0126637	0.0112876	0.00356944
39	0.00770844	0.017122	0.00984645	0.0323164	0.037518	0.0136741	0.00554944	0.00906428	0.0258635	0.00837592		0.0167039	0.0113054	0.00357509
52	0.00770844	0.017122	0.0164108	0.0403956	0.037518	0.0136741	0.00554944	0.00906428	0.0344847	0.00837592		0.0190303	0.0133294	0.00421512
65	0.0154169	0.0195679	0.0180518	0.0484747	0.043771	0.0136741	0.00554944	0.0181286	0.0387952	0.00837592		0.0229806	0.0151024	0.00477579
78	0.0192711	0.0220139	0.0246161	0.0565538	0.056277	0.0227903	0.00554944	0.0271928	0.0431058	0.0125639		0.0289934	0.0174062	0.00550434
91	0.0231253	0.0220139	0.0295393	0.0605933	0.06253	0.0273483	0.00739925	0.0271928	0.0474164	0.0139599		0.0321119	0.0186998	0.00591338
104	0.0385422	0.0244599	0.0311804	0.0605933	0.081289	0.0273483	0.00739925	0.031725	0.0560376	0.0139599		0.0372535	0.0226114	0.00715035
117	0.0423964	0.0269059	0.0328215	0.0767516	0.087542	0.0273483	0.00739925	0.0362571	0.0560376	0.0139599		0.040742	0.0258335	0.00816926
130	0.0462506	0.0269059	0.0344626	0.0848307	0.087542	0.0319064	0.00924907	0.0407892	0.0560376	0.0139599		0.0431934	0.0265754	0.00840389
143	0.0462506	0.0269059	0.0344626	0.0888702	0.087542	0.0319064	0.00924907	0.0453214	0.0560376	0.0139599		0.0440506	0.0272853	0.00862837
156	0.0501048	0.0317979	0.0344626	0.0929098	0.087542	0.0319064	0.00924907	0.0453214	0.0646587	0.0181478		0.04661	0.0277845	0.00878624
169	0.0578133	0.0317979	0.0361036	0.0929098	0.087542	0.0319064	0.0110989	0.0453214	0.0689693	0.0181478		0.048161	0.0279668	0.00884387
180	0.0578133	0.0317979	0.0361036	0.0929098	0.087542	0.0319064	0.0110989	0.0453214	0.0689693	0.0181478		0.048161	0.0279668	0.00884387
Time(s)	Rph3A											Mean	SD	SEM
0	0	0	0	0	0	0	0	0	0	0		0	0	0
13	0.0119787	0.0335956	0.0302176	0.0634561	0.0128799	0.0520503	0.00220021	0.00955167	0.00534176	0.0046692		0.0225941	0.0214179	0.00677293
26	0.0119787	0.0671912	0.0366928	0.0828454	0.0257597	0.0892291	0.0132012	0.017193	0.0142447	0.00933839		0.0367674	0.0311534	0.00985157
39	0.0119787	0.085516	0.0410096	0.107523	0.0321997	0.121451	0.0154015	0.034386	0.0267088	0.0186768		0.0494851	0.0401118	0.0126845
52	0.0279503	0.0977326	0.0496432	0.121624	0.0429329	0.138801	0.0264025	0.040117	0.0427341	0.0280152		0.0615953	0.0417351	0.0131978
65	0.0519076	0.106895	0.0604352	0.135725	0.0472262	0.153672	0.0396038	0.0534893	0.0569788	0.0513612		0.0757295	0.0408314	0.012912
78	0.0678792	0.113003	0.0690688	0.151589	0.0558128	0.163587	0.0462044	0.0668617	0.0694429	0.0653688		0.0868818	0.0411219	0.0130039
91	0.0918366	0.116057	0.0820192	0.176267	0.0601061	0.171022	0.052805	0.0725927	0.0801264	0.0747071		0.097754	0.0435417	0.0137691
104	0.147737	0.12522	0.0884943	0.18508	0.0622527	0.17598	0.0616058	0.0764133	0.0854681	0.0840455		0.10923	0.0461013	0.0145785
117	0.167702	0.128274	0.097128	0.18508	0.066546	0.17598	0.0660063	0.0783237	0.0872487	0.0887147		0.1141	0.0464867	0.0147004
130	0.183673	0.134382	0.101445	0.186843	0.0729859	0.185894	0.0748071	0.080234	0.0872487	0.0933839		0.12009	0.0483396	0.0152863
143	0.187666	0.134382	0.103603	0.190368	0.0772792	0.188372	0.0814077	0.0821443	0.0872487	0.0933839		0.122586	0.0484683	0.015327
156	0.191659	0.140491	0.110078	0.190368	0.0794259	0.188372	0.0836079	0.0821443	0.0872487	0.0933839		0.124678	0.0485864	0.0153644
169	0.199645	0.143545	0.112237	0.192131	0.0815725	0.188372	0.0836079	0.0821443	0.0890293	0.0933839		0.126567	0.0497841	0.0157431
180	0.199645	0.143545	0.112237	0.192131	0.0815725	0.188372	0.0858081	0.0821443	0.0890293	0.0933839		0.126787	0.0495775	0.0156778
Time(s)	Rph3A KA											Mean	SD	SEM
0	0	0	0	0	0	0	0	0	0			0	0	0
13	0.0214374	0	0.0125147	0	0.00423947	0.00552472	0.00786546	0.0022187	0.0119349			0.00730392	0.00701586	0.00233862
26	0.035729	0.003522	0.0125147	0.00637443	0.0169579	0.0110494	0.0104873	0.00443741	0.0318263			0.0147665	0.0115975	0.00386584
39	0.0464477	0.007044	0.0166862	0.00956164	0.0254368	0.0165741	0.0157309	0.00887481	0.0397829			0.0206821	0.0139541	0.00465138
52	0.0500206	0.010566	0.0208578	0.0127489	0.0254368	0.0165741	0.0183527	0.0133122	0.0397829			0.0230725	0.0134103	0.0044701
65	0.0571664	0.01761	0.0250294	0.0191233	0.0254368	0.0165741	0.0209746	0.0133122	0.0517177			0.0274383	0.0158436	0.00528119
78	0.0643122	0.021132	0.0333725	0.0223105	0.0296763	0.0193365	0.0209746	0.0177496	0.055696			0.0316178	0.0169873	0.00566243
91	0.0786038	0.028176	0.0417156	0.0223105	0.0296763	0.0220989	0.0262182	0.0199683	0.055696			0.0360515	0.0195902	0.00653006
104	0.0786038	0.028176	0.0458872	0.0223105	0.0339158	0.0248612	0.02884	0.0199683	0.0596743			0.0380263	0.0197537	0.00658457
117	0.0821767	0.031698	0.0458872	0.0286849	0.0339158	0.0248612	0.02884	0.022187	0.0676309			0.0406535	0.0208511	0.00695037
130	0.0893225	0.031698	0.0500587	0.0318722	0.0381553	0.0276236	0.0314618	0.0244057	0.0676309			0.043581	0.0217646	0.00725487
143	0.0893225	0.031698	0.0584019	0.0318722	0.0381553	0.0276236	0.0314618	0.0244057	0.0676309			0.044508	0.0222473	0.00741578
156	0.0893225	0.031698	0.0584019	0.0350594	0.0381553	0.0303859	0.0340837	0.0266245	0.0676309			0.0457069	0.0213447	0.00711489
169	0.0928954	0.031698	0.0625734	0.0350594	0.0381553	0.0303859	0.0340837	0.0266245	0.0716092			0.0470094	0.0230963	0.00769876
180	0.0928954	0.031698	0.0625734	0.0382466	0.0381553	0.0359107	0.0340837	0.0288432	0.0716092			0.0482239	0.0222192	0.00740638
Time(s)	Rph3A GLAA												Mean	SD	SEM
0	0	0	0	0	0	0	0	0	0	0	0		0	0	0
13	0.0180511	0.00408261	0.00549712	0.00443842	0	0.0111346	0.0245811	0.040758	0	0.006799	0.00947429		0.0113469	0.0122538	0.00369467
26	0.0361021	0.00544348	0.00549712	0.00739736	0	0.0111346	0.0368717	0.0448338	0.0035255	0.006799	0.0170537		0.015878	0.0157726	0.00475563
39	0.0421192	0.010887	0.00824567	0.0103563	0	0.0133615	0.043017	0.0570613	0.0035255	0.00906533	0.0208434		0.019862	0.0188211	0.00567477
52	0.0421192	0.0163304	0.00961995	0.0133153	0	0.0200423	0.0460896	0.0570613	0.00705099	0.0158643	0.0246331		0.0229206	0.0179493	0.00541192
65	0.0481362	0.020413	0.0137428	0.0162742	0	0.0267231	0.0491623	0.0652129	0.00705099	0.0181307	0.026528		0.0264886	0.0198377	0.00598131
78	0.0541532	0.0217739	0.0151171	0.0177537	0.0130339	0.02895	0.0522349	0.0733645	0.0105765	0.0181307	0.0284229		0.0303192	0.0205082	0.00618345
91	0.0601702	0.0244957	0.0164913	0.0192331	0.0195508	0.0378577	0.0583802	0.0774403	0.0176275	0.0181307	0.0322126		0.03469	0.0212669	0.0064122
104	0.0661872	0.0285783	0.0178656	0.0221921	0.0260677	0.0378577	0.0645255	0.0855919	0.021153	0.027196	0.0322126		0.0390389	0.0225205	0.00679019
117	0.0782213	0.0381043	0.0178656	0.0266305	0.0391016	0.0400847	0.0645255	0.0855919	0.021153	0.027196	0.0322126		0.0427897	0.0230397	0.00694672
130	0.0842383	0.0408261	0.0178656	0.0310689	0.0716863	0.0423116	0.0675981	0.0855919	0.021153	0.027196	0.0322126		0.0474317	0.0251978	0.00759744
143	0.0842383	0.042187	0.0178656	0.0325484	0.0782032	0.0445385	0.0706708	0.0855919	0.021153	0.027196	0.039792		0.0494531	0.0255791	0.00771237
156	0.0842383	0.0449087	0.0178656	0.0355073	0.0847201	0.0467654	0.0737434	0.0855919	0.021153	0.027196	0.0416869		0.0512161	0.0262533	0.00791565
169	0.0842383	0.0449087	0.0192399	0.0369868	0.0847201	0.0467654	0.076816	0.0855919	0.021153	0.0294623	0.0492663		0.0526499	0.0258704	0.00780022
180	0.0842383	0.0449087	0.0192399	0.0369868	0.0847201	0.0467654	0.076816	0.0855919	0.021153	0.0317286	0.0511612		0.0530282	0.0256554	0.0077354

## Sheet: 4H
	Control	sh1	WT	K3	GLAA
	0.0844035	0.0578133	0.199645	0.0928954	0.0842383
	0.2259	0.0317979	0.143545	0.031698	0.0449087
	0.0551979	0.0361036	0.112237	0.0625734	0.0192399
	0.129417	0.0929098	0.192131	0.0382466	0.0369868
	0.0718398	0.087542	0.0815725	0.0381553	0.0847201
	0.19314	0.0319064	0.188372	0.0359107	0.0467654
	0.112615	0.0110989	0.0858081	0.0340837	0.076816
	0.114921	0.0453214	0.0821443	0.0288432	0.0855919
	0.103878	0.0689693	0.0890293	0.0716092	0.021153
		0.0181478	0.0933839		0.0317286
					0.0511612
Mean	0.121257	0.048161	0.126787	0.0482239	0.0530282
SD	0.0556381	0.0279668	0.0495775	0.0222192	0.0256554
SEM	0.018546	0.00884387	0.0156778	0.00740638	0.0077354
