# Supplementary material for: Rabphilin 3A binds the N-peptide of SNAP-25 to promote SNARE complex assembly in exocytosis
Source: eLife. 2022 Sep 29;11:e79926. doi: 10.7554/eLife.79926 (PMC9522249; doi:10.7554/eLife.79926)
Supplement: Figure 5—figure supplement 1—source data 1. [file elife-79926-fig5-figsupp1-data1.xlsx]

## Sheet: 1C
		no Syx1	add. Syx1	add. Rph3A FL	add. Rph3A K3
		0.0288231	0.0860621	0.155331	0.0836069
		0.0097625	0.0987359	0.155043	0.0896249
		0.0195733	0.104206	0.130015	0.0988431
	Mean	0.0193863	0.0963345	0.146796	0.0906916
	SD	0.00953166	0.00930705	0.0145335	0.00767391
	SEM	0.0055031	0.00537343	0.00839093	0.00443053

## Sheet: 1E
		no SN25 11-206	add. SN25 11-206	add. Rph3A FL
		0.0288231	0.0997	0.0993
		0.0097625	0.106674	0.0977823
		0.0195733	0.0973	0.0849
	Mean	0.0193863	0.101225	0.0939941
	SD	0.00953166	0.00486927	0.00791221
	SEM	0.0055031	0.00281127	0.00456811

## Sheet: 1G
		no SN23	add. SN23	add. Rph3A FL
		0.0329885	0.0854549	0.0804081
		0.0270018	0.076192	0.0804081
		0.0041215	0.128828	0.0758208
	Mean	0.0213706	0.0968249	0.078879
	SD	0.0152351	0.0280996	0.00264847
	SEM	0.00879601	0.0162233	0.00152909
