# Supplementary material for: Rabphilin 3A binds the N-peptide of SNAP-25 to promote SNARE complex assembly in exocytosis
Source: eLife. 2022 Sep 29;11:e79926. doi: 10.7554/eLife.79926 (PMC9522249; doi:10.7554/eLife.79926)
Supplement: Figure 5—source data 1. [file elife-79926-fig5-data1.xlsx]

## Sheet: 5C
	no Syx1	add. Syx1	add. Rph3A FL	add. Rph3A K4	add. Rph3A K3
	0.0262836	0.184535	0.37546	0.297574	0.146421
	0.09422	0.213763	0.323497	0.322625	0.150974
	0.034426	0.168561	0.340841	0.310099	0.131773
Mean	0.0516432	0.188953	0.346599	0.310099	0.143056
SD	0.0370967	0.0229225	0.0264558	0.0125255	0.0100332
SEM	0.0214178	0.0132343	0.0152743	0.00723157	0.00579266

## Sheet: 5E
	SN25 11-206			SN25 1-206
	no Syx1	add. Syx1	add. Rph3A FL	add. Rph3A FL
	0.0364469	0.217606	0.170567	0.37546
	0.0715441	0.167789	0.192908	0.323497
	0.0203714	0.21412	0.178354	0.340841
Mean	0.0427875	0.199839	0.18061	0.346599
SD	0.0261689	0.02781	0.0113399	0.0264558
SEM	0.0151086	0.0160561	0.0065471	0.0152743

## Sheet: 5G
Time (s)	no Syx1			add. Syx1			add. Rph3A FL			add. Rph3A K3			add. Rph3A GLAA	add. Rph3A GLAA	add. Rph3A GLAA
0	0	0	0	0	8.84847e-07	8.35214e-07	0	0	0	0	0	0	0	0	0
21	0.012628	0.007248	-0.00362	0.002082	-0.00810599	-0.0060717	0.002811	-0.0059	0.002584	-0.00365	0.002215	5.18e-05	0.000209	0.006473	-0.00134
41	0.016221	0.001986	-0.00049	-0.00027	-0.00902578	-0.00743869	0.001042	-0.00727	0.001144	0.004032	0.000197	-0.00079	-0.00122	0.000759	0.002807
61	0.007882	0.012971	0.00776	0.001287	-0.00936144	-0.00760143	-0.00431	-0.00234	0.002781	0.004407	-0.00325	0.003148	-0.00285	0.003444	-0.00321
81	0.0077	0.010997	0.005878	-0.00364	-0.00529018	-0.000590554	0.012163	0.003404	0.002523	0.005398	-0.00447	-0.00269	0.000351	0.001849	-0.00038
101	0.012377	0.004091	-0.00624	-0.00393	-0.00511206	-0.00278425	0.004664	0.011869	0.001686	0.000709	-0.00635	-0.00244	-0.00077	-0.00077	-0.00211
121	0.001985	0.005498	-0.00407	-0.00149	-0.00514127	-0.00408097	0.004228	0.006234	-0.00196	0.000935	-0.00295	0.002919	0.001266	0.007246	-0.00135
141	0.011225	0.006669	0.008733	-0.00153	-1.82487e-05	-0.00361457	0.008614	0.016048	0.003864	0.003738	-0.00429	-0.00221	0.003129	0.004323	0.000211
161	0.008578	0.006964	0.003114	-0.00257	-0.00731492	0.000391265	0.013254	0.009591	0.008786	0.000797	-0.00359	0.00289	0.002555	0.004864	0.006013
181	-0.0003	0.004623	0.009953	-0.00327	-0.00433397	-0.00453489	0.006275	0.01458	0.001907	0.002812	-0.00447	-0.00542	0.00286	0.006129	-0.00039
201	0.007939	0.009471	0.007488	-0.00356	0.00229968	-0.00540065	0.005367	0.023197	0.002154	-0.0007	-0.00404	-0.00662	0.000706	-0.00034	-0.00349
221	0.010232	0.008324	0.01177	-0.00096	-0.00347835	0.00381316	0.014986	0.011927	0.004541	-0.0004	-0.00245	-0.00102	0.000551	0.008202	0.001084
241	0.003114	0.008821	-0.0079	-0.00439	-0.0083672	-0.00164594	0.007778	0.006586	-0.00383	0.000898	-0.00086	0.003756	0.001098	0.007619	0.003022
261	0.012366	0.006598	0.009862	-0.0042	-0.0113425	-0.00256819	0.005403	0.006609	0.011407	0.006502	-0.00245	0.004089	0.003953	0.01121	0.003237
281	0.00332	0.004032	-0.00363	0.001802	-0.00523575	-0.00702979	0.004095	0.011763	-0.00482	0.006615	-0.00127	-0.00453	0.001047	0.003057	-0.00257
301	0.003046	0.003465	0.004672	-0.00069	-0.00630014	-0.00202505	0.004906	0.012444	0.006731	0.003682	-0.00335	0.000757	0.002842	0.001778	-0.00081
321	0.004871	0.006527	0.011212	0.007892	-0.00717455	0.00110468	0.013871	0.010659	-0.00644	0.003287	-0.00337	0.000235	0.000802	0.000815	0.002969
341	0.003377	-0.00197	-0.0095	-0.0003	-0.0120808	-0.000573007	0.012466	0.008793	0.012847	0.006748	-0.00047	0.003785	0.00327	0.007928	0.001926
361	0.007689	0.010618	-0.01583	0.007701	-0.0031229	-0.00286988	0.00699	0.019781	0.003286	0.010313	-0.00067	0.003636	0.001685	0.006691	0.002952
381	0.006149	-0.00376	-0.00327	0.003369	0.00206018	0.00499363	0.009244	0.022211	0.001021	0.006015	-2.6e-05	-0.00097	0.003717	0.008202	0.000496
401	0.012423	0.004966	-0.00527	0.005015	-0.00439124	-0.00578442	0.007814	0.0162	0.013413	0.006204	0.00083	-0.00213	0.006285	0.004667	0.002461
421	0.007939	-8.3e-05	0.004425	0.003761	-0.0085011	1.18051e-05	0.009013	0.014897	0.010546	0.005789	-0.00157	0.005046	0.004646	0.010086	0.007264
441	0.00543	-0.00019	-0.00117	0.010433	-0.00393281	0.00578651	0.018124	0.01741	0.00966	0.007634	0.00021	0.001284	0.00634	0.008574	0.004421
461	0.014191	0.001998	0.002401	-0.00343	-0.0116558	0.00406113	0.013823	0.007372	-0.00458	0.00686	0.000695	0.001651	0.004732	0.007387	0.011062
481	0.007187	0.003453	-0.00121	0.009817	-0.0037093	-0.000981445	0.009219	0.018126	-0.00028	0.008005	-0.00054	-0.00163	0.005133	0.007731	0.011097
501	-0.00073	0.011942	0.000999	0.001713	-0.00175886	0.00189662	0.016185	0.018267	-0.00375	0.008009	0.000861	-0.00065	0.001835	0.006157	0.005755
521	0.005487	-0.00104	-0.00712	0.009347	-0.000589565	0.00461061	0.018439	0.020333	0.006128	0.004516	0.002547	0.004456	0.004564	0.015181	0.009264
541	0.000992	0.006503	-0.00995	0.003022	-0.00207898	0.00472217	0.018729	0.020884	0.00763	0.006949	0.003481	0.002661	0.006349	0.009383	0.008215
561	0.005464	-0.00092	-0.02084	0.005228	-0.00717284	0.00553759	0.015216	0.011364	0.015567	0.009302	0.005084	0.000751	0.005921	0.008884	0.011663
581	0.007438	0.004671	-0.00758	0.007992	-0.00832864	0.007482	0.017154	0.006492	0.007199	0.009254	0.004346	0.010253	0.007201	0.013354	0.01022
601	0.005282	0.000804	-0.00897	0.008429	-0.00811116	0.00276694	0.012054	0.005811	0.016256	0.008109	0.005093	0.005987	0.005944	0.009038	0.007189
621	0.008076	0.01264	-0.00485	0.014306	-0.00339102	0.00471652	0.012854	0.012502	0.008811	0.008899	-0.00191	-0.00606	0.003047	0.007373	0.005426
641	0.003012	0.003914	-0.00026	0.008216	0.00106138	0.00121842	0.014804	0.022587	0.004725	0.006724	0.004207	-1.7e-05	0.005967	0.003908	0.006505
661	5.7e-05	0.006953	-0.01287	0.009504	-0.000995311	-9.37853e-05	0.01226	0.013864	0.006104	0.008403	0.006321	0.004851	0.008645	0.006234	0.005351
681	-1.1e-05	0.012013	-0.00169	0.002899	0.0032942	0.00585334	0.0169	0.014052	0.012183	0.009036	0.004822	0.003762	0.009187	0.009523	0.004759
701	0.010016	0.009897	-0.0042	0.004892	-0.00498375	-0.00232227	0.00722	0.011282	0.024845	0.010116	0.006487	0.004283	0.008945	0.009544	0.006373
721	0.007415	0.010228	0.005217	0.005754	0.00132391	0.00743008	0.018657	0.016529	0.017265	0.013052	0.005443	0.003389	0.009897	0.008223	0.008018
741	0.005213	0.004517	-0.00352	0.011888	0.00701585	0.00526903	0.021613	0.027834	0.01217	0.011235	0.005499	-0.00102	0.004031	0.005967	0.004943
761	0.006548	0.004541	-0.01147	0.006739	-0.00682273	0.00388391	0.014453	0.006339	0.024082	0.00643	0.007041	0.00316	0.010608	0.012356	0.011369
781	0.003057	-0.00445	-0.01054	0.010601	0.00880386	0.00240798	0.015689	0.02639	0.016047	0.011014	0.009208	0.005711	0.009191	0.008406	0.008531
801	-0.00072	0.009459	-0.00409	0.007433	0.00576185	0.00541873	0.020074	0.020438	0.020366	0.009398	0.006884	0.004416	0.008444	0.008624	0.009255
821	0.004323	0.018115	-0.00218	0.020977	-0.00274429	0.00343329	0.015446	0.009204	0.015677	0.009741	0.009439	0.003716	0.005342	0.009404	0.010049
841	0.015503	0.004221	-0.0018	0.008295	-0.00390132	0.0132308	0.027694	0.01208	0.018926	0.008834	0.008343	0.004702	0.008166	0.01159	0.009185
861	0.008145	0.002708	-0.00141	0.012078	0.0130983	0.00888698	0.019699	0.029959	0.026445	0.008407	0.010405	0.003813	0.007943	0.006319	0.009522
881	0.006149	0.0059	-0.01307	0.013981	0.00146647	0.00440195	0.019468	0.017398	0.048251	0.009495	0.009335	0.009789	0.008385	0.009608	0.010562
901	0.012696	-0.00071	-0.01431	0.007153	0.00564643	0.012549	0.026156	0.020356	0.014472	0.011666	0.011929	0.004111	0.008877	0.008814	0.011369
921	0.005396	0.000177	0.001882	0.016567	0.0048496	0.00909746	0.02366	0.022786	0.016871	0.009028	0.00795	0.003251	0.006331	0.007872	0.012316
941	0.010643	0.009861	-0.00121	0.0195	0.0024834	0.00928541	0.022376	0.018877	0.007494	0.010675	0.008221	0.001806	0.006868	0.004013	0.009724
961	0.000821	0.007248	-0.01491	0.014989	0.0119987	0.0136043	0.030481	0.029759	0.02124	0.01107	0.009352	0.00683	0.011805	0.01374	0.013347
981	-0.00595	-0.00582	-0.00892	0.011664	0.00641223	0.0080838	0.021855	0.018818	0.027036	0.010325	0.009868	0.003865	0.009469	0.012131	0.015983
1001	0.003662	0.002022	-0.00567	0.01528	0.00743595	0.00677784	0.022861	0.022446	0.017548	0.007453	0.010754	0.002018	0.005092	0.005623	0.012663
1021	0.005168	0.007189	-0.00187	0.013802	0.0084161	0.0086703	0.01684	0.02281	0.01745	0.009157	0.010108	0.000631	0.007793	0.012693	0.012093
1041	0.008247	0.005652	-0.0078	0.024492	0.0087094	0.0127411	0.02807	0.02416	0.014705	0.008093	0.009741	-0.00057	0.004154	0.005833	0.010325
1061	-0.0029	-0.00167	-0.00995	0.010948	0.00914146	0.0150855	0.029948	0.022821	0.016465	0.007658	0.008566	0.007277	0.015772	0.013775	0.013259
1081	0.005031	0.00078	-0.00472	0.009739	0.0110576	0.0170208	0.032177	0.029208	0.019357	0.011433	0.013074	0.007563	0.012753	0.015455	0.012277
1101	-0.00057	0.015111	-0.00505	0.010175	0.00780978	0.0191983	0.039312	0.025052	0.018594	0.010788	0.010772	0.004398	0.012097	0.00816	0.011369
1121	0.001027	0.000154	-0.01556	0.001511	0.0143598	0.0161719	0.028155	0.033457	0.014324	0.010301	0.011143	0.009559	0.013837	0.013354	0.010759
1141	0.007677	0.001537	0.002219	0.013533	0.00857888	0.0144725	0.028458	0.022974	0.020834	0.010921	0.011824	0.007088	0.008581	0.017599	0.008755
1161	0.000844	-0.00251	-0.001	0.009392	0.0122596	0.0131337	0.026071	0.027012	0.020366	0.007654	0.010754	0.004639	0.015349	0.016601	0.013895
1181	-0.00562	-0.00319	-0.01254	0.022309	0.0177144	0.0159765	0.029293	0.036474	0.023332	0.010941	0.013056	0.007196	0.011409	0.008251	0.010527
1201	0.007529	-4.7e-05	-0.0054	0.017507	0.00820454	0.0163396	0.033509	0.025334	0.022716	0.010015	0.01006	0.003905	0.012097	0.013635	0.020589
1221	-0.00747	0.004292	-0.01264	0.015392	0.0106471	0.019659	0.039615	0.030499	0.028918	0.012468	0.013244	0.00992	0.0136	0.01497	0.010834
1241	0.002795	0.002613	-0.02171	0.013097	0.0134913	0.0195828	0.035751	0.034843	0.018926	0.013443	0.01493	0.008326	0.011978	0.015469	0.011873
1261	-0.0036	0	-0.0078	0.018716	0.0161514	0.025932	0.041275	0.031661	0.021277	0.010567	0.009972	0.001359	0.011382	0.014865	0.010123
1281	0.008179	0.000296	-0.00243	0.015324	0.0124339	0.0179697	0.029124	0.028092	0.025694	0.008146	0.012549	0.011663	0.0157	0.013101	0.015325
1301	0.009171	-0.00469	-0.00487	0.010981	0.0198442	0.0245818	0.039385	0.034091	0.03042	0.015268	0.011134	0.011434	0.01667	0.01613	0.014356
1321	0.005726	0.004032	-0.00212	0.010198	0.012915	0.0172172	0.031729	0.028092	0.017819	0.013213	0.013899	0.009003	0.0135	0.020206	0.016343
1341	0.000262	-0.0016	-0.01627	0.017608	0.0135981	0.0165608	0.03374	0.03341	0.0285	0.014321	0.013165	0.006411	0.013058	0.013501	0.015281
1361	0.001198	0.000733	-0.00712	0.003918	0.0158324	0.0156207	0.03248	0.033645	0.024599	0.010555	0.015673	0.010224	0.01672	0.020199	0.014277
1381	-0.00066	0.005617	-0.02201	0.021996	0.0148981	0.0231569	0.042438	0.033798	0.021018	0.010929	0.015891	0.013177	0.015139	0.01821	0.011373
1401	-0.00779	-0.00786	-0.01823	0.018559	0.0111744	0.0193519	0.033085	0.033211	0.032278	0.013407	0.015529	0.006061	0.014862	0.016439	0.017229
1421	-0.00284	0.00311	-0.00838	0.019231	0.0187255	0.0204841	0.041711	0.037754	0.027036	0.012557	0.013375	0.004306	0.014711	0.023495	0.016111
1441	-0.00228	0.00259	-0.01444	0.023619	0.0210367	0.0248057	0.04451	0.039632	0.031995	0.012674	0.009247	0.010517	0.011282	0.015434	0.011251
1461	0.000388	-0.00382	-0.00842	0.01528	0.0201299	0.0209483	0.041336	0.039104	0.034751	0.010768	0.016179	0.012879	0.019047	0.02008	0.014672
1481	0.002361	0.004375	0.001414	0.022365	0.0207354	0.0280259	0.046085	0.048813	0.033447	0.015328	0.014091	0.017226	0.016328	0.01483	0.011452
1501	0.005498	0.004848	-0.01488	0.011407	0.0150126	0.0195657	0.039748	0.036944	0.035108	0.012347	0.01562	0.009347	0.016979	0.019096	0.015277
1521	-0.00249	0.002708	-0.02324	0.020988	0.0184361	0.0293528	0.0515	0.039186	0.035404	0.01219	0.0122	0.008022	0.013996	0.018309	0.011983
1541	0.009993	0.006693	-0.00776	0.013903	0.0164665	0.0275038	0.049634	0.033305	0.0309	0.009882	0.014463	0.008716	0.018633	0.0219	0.016768
1561	0.000696	-0.00268	-0.02316	0.018918	0.0183558	0.0260585	0.040827	0.038353	0.045027	0.015534	0.013004	0.00828	0.015904	0.018808	0.013615
1581	0.000696	-0.00031	-0.0167	0.018548	0.0176183	0.0220751	0.047805	0.037108	0.033225	0.012025	0.016682	0.01593	0.017918	0.017269	0.016045
1601	-0.00622	0.006468	-0.01518	0.015212	0.0183963	0.0164053	0.038052	0.035019	0.022581	0.017258	0.014712	0.014594	0.013181	0.01918	0.015764
1621	-0.00183	0.003358	-0.01604	0.016947	0.016029	0.021916	0.039991	0.039092	0.036683	0.011239	0.016738	0.01437	0.01677	0.020522	0.014716
1641	-0.00415	-0.00025	-0.0092	0.017742	0.0236979	0.0244034	0.047672	0.043706	0.042541	0.01893	0.018062	0.011738	0.016446	0.019293	0.015566
1661	0.000194	-0.0079	0.000402	0.015403	0.0118809	0.0177795	0.039494	0.031802	0.044202	0.012086	0.015603	0.01066	0.018114	0.014879	0.014211
1681	-0.00396	-0.00143	0.004321	0.013948	0.0155517	0.0238224	0.044812	0.037038	0.028242	0.016763	0.017913	0.011486	0.018173	0.020642	0.015308
1701	0.00616	-0.00027	-0.01017	0.018694	0.0136633	0.0248653	0.046436	0.03496	0.039009	0.013258	0.020639	0.017277	0.020404	0.019616	0.013522
1721	-0.00086	-0.00575	-0.00131	0.017507	0.0101571	0.0199016	0.041323	0.031027	0.033189	0.018418	0.013305	0.017558	0.019015	0.018681	0.014229
1741	0.004164	0.007367	-0.01015	0.016992	0.0149453	0.0190832	0.04543	0.035383	0.037557	0.015538	0.013615	0.017467	0.020136	0.020705	0.013641
1761	-0.00486	-0.01136	-0.01267	0.023283	0.0170509	0.0175307	0.036247	0.035524	0.040535	0.017141	0.022889	0.019222	0.039383	0.037454	0.019369
1781	-0.00188	0.001868	-0.01208	0.015235	0.0173718	0.024548	0.045067	0.038799	0.044264	0.018857	0.011077	0.013544	0.01697	0.022561	0.014716
1801	0.001757	-0.00383	-0.01152	0.024492	0.0193405	0.0229167	0.04726	0.038435	0.040646	0.013266	0.017642	0.012713	0.017185	0.023411	0.013992
1821	0.000935	-0.00432	-0.01769	0.020686	0.0159783	0.0292383	0.053378	0.038235	0.042516	0.015615	0.015454	0.007391	0.018646	0.019447	0.01322
1841	-0.00447	-0.00404	-0.01683	0.015212	0.0152765	0.0256796	0.047017	0.04191	0.043722	0.013802	0.014445	0.01019	0.020131	0.014183	0.017584
1861	0.000856	0.000378	-0.00936	0.017104	0.014619	0.02166	0.044473	0.031403	0.042356	0.015913	0.013624	0.010345	0.016806	0.020417	0.016031
1881	-0.00068	0.001289	-0.01333	0.016153	0.0174644	0.0215069	0.045212	0.036498	0.050786	0.016122	0.015354	0.011119	0.016847	0.020108	0.01347
1901	-0.00218	-0.0102	-0.03357	0.016197	0.0176788	0.0251498	0.046242	0.039703	0.05305	0.014257	0.011204	0.00988	0.020227	0.020192	0.017694
1921	-0.00032	-0.00672	-0.01889	0.023809	0.0184875	0.0165694	0.04056	0.03982	0.045839	0.013802	0.015446	0.010935	0.019293	0.022526	0.01497
1941	-0.00216	-0.00143	-0.00745	0.024772	0.0236802	0.021256	0.044934	0.042837	0.039551	0.014434	0.015865	0.016073	0.020495	0.022561	0.017045
1961	-0.00448	0.00214	-0.0122	0.020216	0.0196323	0.0277337	0.049998	0.039914	0.051635	0.01447	0.017171	0.014055	0.01973	0.021809	0.018575
1981	0.000605	-0.00581	-0.0065	0.023675	0.0153345	0.0192052	0.042474	0.033258	0.058809	0.016311	0.015245	0.015815	0.018341	0.028521	0.022672
2001	-0.00018	-0.00526	-0.00413	0.022365	0.0186711	0.0251404	0.053087	0.03597	0.046479	0.01889	0.01956	0.01835	0.01938	0.023749	0.01808
2021	-0.00441	-0.00553	-0.01078	0.020932	0.0209061	0.0231719	0.048096	0.040114	0.046848	0.017721	0.01735	0.015976	0.020482	0.02916	0.019154
2041	0.005806	-0.01025	-0.01156	0.015716	0.00943074	0.0172955	0.044243	0.031121	0.044399	0.016138	0.01593	0.011669	0.02469	0.024873	0.021352
2061	0.003103	-0.00415	-0.00973	0.018604	0.0218199	0.0192216	0.044098	0.046535	0.042159	0.016521	0.016066	0.01203	0.023497	0.021134	0.021106
2081	-0.00797	-0.00424	-0.00677	0.029138	0.018518	0.0220956	0.044776	0.036874	0.045839	0.015518	0.015952	0.012397	0.01897	0.021338	0.019453
2101	-0.00127	-0.00497	-0.00559	0.025925	0.019192	0.0205805	0.050119	0.041792	0.056311	0.015272	0.013082	0.010654	0.021129	0.020825	0.017917
2121	0.00081	-0.01032	-0.00241	0.017944	0.018725	0.0272143	0.054916	0.04488	0.05545	0.014176	0.016044	0.016068	0.01989	0.024353	0.022461
2141	-0.00457	-0.00061	-0.01718	0.027929	0.0204488	0.0208345	0.046521	0.041898	0.047759	0.016795	0.018114	0.014709	0.023397	0.026004	0.022299
2161	0.004825	-0.00351	-0.00611	0.025421	0.0171571	0.0237636	0.04692	0.041569	0.054847	0.017032	0.016878	0.014749	0.023288	0.026026	0.021264
2181	-0.00455	0.00039	-0.01074	0.026932	0.0253773	0.0245635	0.050797	0.046382	0.049124	0.016932	0.016284	0.015018	0.023684	0.025709	0.022409
2201	-0.003	-0.00864	-0.00773	0.025992	0.0259327	0.0151646	0.037422	0.04164	0.054416	0.018656	0.013895	0.015116	0.02086	0.024789	0.022962
2221	-0.00712	-0.00931	-0.01404	0.027772	0.0181616	0.0232268	0.053281	0.041335	0.060273	0.017254	0.017337	0.017885	0.022504	0.023439	0.0244
2241	-0.00908	0.005321	-0.01137	0.021369	0.0218707	0.024231	0.048507	0.042614	0.053001	0.018765	0.01573	0.020569	0.0203	0.026138	0.02047
2261	0.003034	-0.00329	-0.00773	0.027537	0.0138502	0.0165391	0.042159	0.04198	0.054945	0.017907	0.015533	0.013493	0.021466	0.024409	0.023874
2281	-0.0085	-0.00097	-0.01163	0.020865	0.0220624	0.0219744	0.047284	0.043612	0.055019	0.014776	0.016734	0.013837	0.022135	0.026075	0.023742
2301	-0.00894	-0.00221	-0.01128	0.019332	0.0148584	0.0222094	0.04709	0.035794	0.051413	0.018309	0.017075	0.01843	0.023101	0.025351	0.025742
2321	-0.00023	-0.00305	-0.00554	0.022265	0.0236879	0.0183299	0.047647	0.046699	0.057345	0.016807	0.014703	0.016349	0.021912	0.023221	0.021466
2341	-0.00818	-0.01716	-0.02524	0.026339	0.0158321	0.0223483	0.04772	0.042626	0.05305	0.017318	0.02063	0.018172	0.025715	0.027157	0.026751
2361	-0.00597	-0.00099	-0.01219	0.016858	0.0222871	0.0215288	0.052481	0.043084	0.054724	0.018712	0.019656	0.014898	0.022718	0.029273	0.022273
2381	-0.00637	-0.01378	-0.00175	0.017641	0.0184624	0.0210489	0.042014	0.043037	0.055277	0.019115	0.016184	0.023293	0.021903	0.024472	0.023834
2401	-0.00384	-0.00339	-0.00463	0.020238	0.0265691	0.0184364	0.044207	0.05561	0.049789	0.015755	0.01455	0.018545	0.021616	0.027235	0.024826
2421	-0.00788	-0.00293	-0.01216	0.027279	0.0129475	0.0171558	0.04205	0.03597	0.061024	0.01698	0.018582	0.021062	0.02587	0.032386	0.025891
2441	-0.00034	-0.00182	-0.01072	0.021403	0.0200938	0.0227759	0.05259	0.045936	0.052373	0.019816	0.01676	0.017123	0.026826	0.02689	0.024383
2461	-0.01429	-0.00099	0.001401	0.028287	0.0220977	0.0211893	0.052893	0.048543	0.054502	0.020445	0.016197	0.018189	0.025264	0.030004	0.025343
2481	-0.00444	-0.0084	-0.01264	0.027828	0.0223659	0.023971	0.055534	0.046664	0.066316	0.02119	0.018298	0.020661	0.022795	0.030524	0.026826
2501	-0.00914	-0.01022	-0.0168	0.025925	0.0238948	0.0222311	0.049162	0.04954	0.054797	0.018773	0.018333	0.022261	0.024185	0.02973	0.027979
2521	-0.0086	-0.00594	-0.02153	0.021515	0.0269146	0.0269175	0.054868	0.050433	0.063227	0.021488	0.013938	0.013694	0.020778	0.023798	0.022435
2541	-0.00818	-0.00914	-0.00968	0.030716	0.0194767	0.0233243	0.053983	0.039221	0.056397	0.016408	0.01825	0.018877	0.023798	0.023826	0.025128
2561	-0.00991	-0.00817	-0.0108	0.023272	0.0255318	0.0279246	0.055825	0.04913	0.058181	0.021947	0.013812	0.01468	0.023716	0.026349	0.02129
2581	-0.00029	-0.00251	-0.01108	0.022791	0.0247721	0.016614	0.045358	0.052734	0.05513	0.016428	0.017022	0.020638	0.023401	0.029751	0.023624
2601	0.000856	-0.00498	-0.01001	0.030559	0.0274607	0.0208818	0.04583	0.054401	0.055019	0.020771	0.018223	0.019944	0.020486	0.031501	0.025216
2621	-0.017	-0.01114	-0.00763	0.026037	0.0190009	0.0146785	0.0507	0.043671	0.058083	0.019284	0.021203	0.017908	0.022244	0.032063	0.025694
2641	-0.00591	-0.01986	-0.01047	0.022891	0.0203014	0.0149853	0.046933	0.045443	0.060421	0.01974	0.020844	0.020546	0.022395	0.028535	0.024519
2661	0.00211	-0.00727	-0.00064	0.023955	0.0240162	0.0215513	0.051403	0.047674	0.066266	0.019494	0.018451	0.019778	0.025938	0.029933	0.027194
2681	-0.00132	-0.01259	-6.5e-05	0.023709	0.0252239	0.0218444	0.04692	0.051982	0.061344	0.020981	0.018848	0.016893	0.028776	0.027951	0.026567
2701	-0.00295	-0.01051	-0.00803	0.019164	0.0251914	0.0246158	0.054686	0.051313	0.067337	0.020642	0.017188	0.019755	0.026904	0.029842	0.023782

## Sheet: 5H
	no Syx1	add. Syx1	add. Rph3A FL	add. Rph3A K3	add. Rph3A GLAA
	-0.00099	0.025925	0.054797	0.018773	0.024185
	-0.00594	0.015986	0.04954	0.018333	0.02973
	-0.0086	0.0222311	0.049162	0.022261	0.027979
Mean	-0.00517667	0.0213807	0.0511663	0.019789	0.027298
SD	0.003862	0.00502378	0.00314992	0.00215209	0.00283453
SEM	0.00222973	0.00290048	0.00181861	0.00124251	0.00163652

## Sheet: 5I
Time (s)	no Syx1			add. Syx1			add. Rph3A FL
0	0	0	0	0	0	0	0	0	0
22	-0.00814	-0.00997	-0.00603	-0.00316154	-0.00621539	-0.00107692	-0.00139231	0.00133692	0.00291
42	0.003638	-0.00169	-0.00121	-0.00363077	-0.00532308	0.00294	-0.00147692	-0.000569231	-0.00557692
62	-0.00436	-0.00487	-0.00076	-0.00268462	-0.000476923	0.00391	-0.00120769	0.00832308	0.00407
82	-0.01323	0.002967	-0.00297	-0.00528462	0.000543077	0.00363385	-0.00169231	-0.00557692	0.00325615
102	-0.00811	0.002523	-0.00217	-0.0011	-0.000215385	0.00191077	0.00291154	-0.00946154	-0.0114154
122	-0.01217	-0.00151	0.003331	-0.00424615	-0.0052	0.00240538	-0.00310769	-0.00671538	0.00678308
142	-0.00321	0.002376	-0.00525	-0.00215385	-0.00345385	0.00364539	-0.00281539	-0.00423846	-0.00717692
162	-0.02733	-0.01194	-0.00457	-0.00243846	-0.00896154	0.000123846	-0.00336154	0.00119	9.38462e-05
182	-0.01949	-0.01169	-0.00753	-0.00398462	-0.00539231	0.00657385	-0.00443846	0.00638231	-0.000646154
202	-0.01935	0.00064	-0.00182	-0.00502308	-0.00139231	0.00389308	-0.00376154	0.0106854	-0.00147692
222	-0.00803	0.004985	0.00015	-0.00488462	-0.003	0.00543308	-0.000892308	-0.000538462	-0.000569231
242	0.002835	-0.00657	0.00121	-0.00419231	-0.0102615	0.00994923	0.00372538	0.00868	0.00293769
262	-0.01844	-0.00146	-0.00266	-0.00829231	-0.00577692	0.0135131	0.00437231	0.0118485	1.86923e-05
282	-0.01033	-0.01252	-0.0021	-0.0053	-0.00740769	0.00416308	0.00343154	0.0136154	0.00634308
302	0.002067	-0.00172	0.001606	-0.00689231	-0.000838462	0.00288692	-0.00161538	0.0104292	-0.00539231
322	-0.00148	-0.00241	-0.00918	-0.00706154	-0.000130769	0.0106492	-0.00486923	0.0115277	0.00214231
342	-0.00687	0.001576	-0.00107	-0.00773077	-0.000776923	0.00539769	0.00120615	0.00899154	0.00369538
362	-0.01155	-0.01221	-0.01001	-0.00507692	-0.00829231	0.00699154	-0.00590769	0.00607077	-0.00134615
382	-0.01371	0.007681	-0.00133	-0.000423077	-0.00345385	0.00832077	0.00899	0.0109239	0.00221769
402	-0.00092	-0.00302	0.010902	-0.00513846	0.000754615	0.0144539	-0.00378461	0.0118669	0.00614692
422	0.003354	-0.00284	-0.01284	-0.00417692	0.00037	0.00906692	0.00857769	0.0116469	0.00465
442	-0.00125	-0.0091	0.000975	-0.00813077	0.000732308	0.01543	0.00167615	0.0161515	0.00407923
462	0.001961	0.002265	0.001703	-0.0109077	0.00495	0.00765615	-0.00327692	0.0169023	0.00844846
482	-0.0072	0.006869	-0.0089	-0.0117462	0.00907769	0.0132485	-0.00719231	0.0104015	0.00128154
502	0.004512	0.001686	-0.00167	-0.00256154	0.00407462	0.00825	-0.000992308	0.0138992	-0.00139231
522	-0.01388	0.002622	-0.00431	-0.0006	0.00362231	0.00962	-0.000853846	0.00826846	0.00399461
542	-0.00764	0.001576	0.000653	-0.00828462	0.00432385	0.0115785	0.00662692	0.00180385	-0.00183077
562	-0.00893	-0.00122	-0.00576	-0.00529231	0.00287538	0.0103492	-0.00226154	0.0109323	0.00657692
582	-0.00873	0.00181	-0.00064	0.0216585	0.000837692	0.00908462	0.00668615	0.00682154	0.00297539
602	-0.02168	-0.00937	-0.01552	0.0156331	0.00375769	0.00986692	0.00138231	0.0135608	-0.0004
622	-0.01221	-0.00576	-0.00568	0.0257715	0.0103908	0.0130246	0.00241154	0.00879923	-0.00227692
642	-0.0051	-0.00639	-0.00791	0.0205131	0.00653461	0.00866154	0.0108131	0.0110154	0.00188077
662	0.002339	-0.00331	-0.00569	0.0191246	0.00632385	0.00910846	0.00229385	0.00897308	0.000608462
682	0.004925	-0.00215	-0.00993	0.0152008	0.0106246	0.0138831	0.00429385	0.0145677	-0.00159231
702	0.006331	-0.00867	-0.01342	0.0183685	0.0111608	0.0165708	0.0115485	0.0181846	-0.00246923
722	-0.00131	0.001588	-0.00949	0.02016	0.00950077	0.0134477	0.00587231	0.0137708	0.00589385
742	0.001264	0.004148	-0.00272	0.0210492	0.00580308	0.0167877	0.0118131	0.0141923	0.0116108
762	0.004512	-0.00819	-0.00271	0.0240715	0.00614231	0.0181638	0.0133323	0.0142108	0.01351
782	0.001264	-0.01178	-0.01368	0.0208115	0.0145562	0.0137777	0.0120285	0.01932	0.01757
802	0.001588	-0.00272	-0.00418	0.0216585	0.0125869	0.01199	0.0166169	0.0182762	0.0207046
822	-0.00553	-0.00176	-0.00494	0.01765	0.00992308	0.0161177	0.0243515	0.0152085	0.0142954
842	-0.00652	-0.00442	0.000193	0.0217561	0.0116815	0.0196046	0.0243808	0.0229639	0.0203485
862	-0.00524	-0.00661	-0.00137	0.0272515	0.00448231	0.0180462	0.0217146	0.0222315	0.0169715
882	-0.00852	-0.01312	-0.00161	0.0248085	0.00867077	0.0197339	0.0150877	0.0154192	0.0182715
902	-0.01187	-0.00551	-0.00284	0.0259477	0.00904769	0.0150831	0.0163423	0.0173054	0.0163631
922	0.000343	-0.0026	-0.00393	0.0280862	0.00781	0.0206631	0.02244	0.0171769	0.0151654
942	0.003295	0.005515	-0.00754	0.0236146	0.0108892	0.0162646	0.0233323	0.0160238	0.0151939
962	-0.00237	0.003287	-0.00021	0.0176808	0.01562	0.0178877	0.0169108	0.0249323	0.0142392
982	-0.01454	0.000283	0.000535	0.0236085	0.0199139	0.0207038	0.0183031	0.0184038	0.0105254
1002	0.004063	0.00789	-0.00981	0.0198185	0.0166539	0.0226977	0.0155092	0.0163992	0.0122939
1022	-0.01341	-0.00272	-0.01233	0.0242485	0.0148431	0.0200515	0.0285569	0.0172138	0.00531385
1042	-0.00587	-0.00032	-0.00614	0.0217138	0.0208954	0.0228739	0.03191	0.0204646	0.0137346
1062	-0.00385	-0.00213	-0.00955	0.0185946	0.0162015	0.0232269	0.0267631	0.0201808	0.0106
1082	-0.01723	0.00261	-0.0064	0.0239615	0.0237323	0.0191638	0.0235185	0.01704	0.0144546
1102	0.00287	0.010303	-0.00411	0.0165962	0.0193708	0.0250377	0.0316846	0.0198146	0.0131731
1122	0.002693	-0.00164	-0.0107	0.0186061	0.0152731	0.0189285	0.0266846	0.0148238	0.0161577
1142	0.003094	0.002327	-0.01812	0.0160477	0.0158546	0.0206808	0.0295869	0.0227623	0.00812077
1162	-0.00964	0.00192	-0.00678	0.0242177	0.0215438	0.0180523	0.0265869	0.0184223	0.0105062
1182	-0.01539	0.000591	-0.0055	0.0184423	0.0195215	0.0252554	0.0225085	0.0129377	0.00629615
1202	0.003567	0.000185	-0.00197	0.0172662	0.0185785	0.0219685	0.0311354	0.0181661	0.0166439
1222	-0.00809	0.001379	-0.00392	0.0239008	0.0160577	0.0268139	0.0167246	0.0214531	0.0161108
1242	0.012177	0.007854	-0.007	0.0204223	0.0167369	0.0223569	0.0279592	0.0110154	0.00806462
1262	-0.00631	-0.01036	-0.01668	0.02094	0.0244946	0.02218	0.0345862	0.0134046	0.0123123
1282	-0.01213	0.000172	-0.01599	0.0205808	0.0225254	0.02315	0.0250377	0.0164354	0.00973923
1302	0.002398	0.002253	-0.01151	0.0221339	0.02171	0.0275077	0.01943	0.0152269	0.0104508
1322	-0.01163	8.62e-05	-0.00837	0.0237423	0.0215139	0.0241615	0.0297138	0.0182392	0.0143985
1342	-0.00681	0.000628	-0.01725	0.0229385	0.0140661	0.0251085	0.0243808	0.0202815	0.0185523
1362	-0.01033	-0.01222	-0.012	0.0226092	0.0175746	0.0266669	0.0207046	0.0206839	0.0201523
1382	-0.00699	0.008814	-0.00335	0.0206592	0.0186692	0.0212808	0.0294885	0.0109877	0.0212
1402	0.006602	-0.00374	-0.01003	0.0236446	0.0233246	0.0259961	0.0279492	0.0231654	0.0224069
1422	-0.00719	-0.00526	-0.01123	0.0220485	0.0288339	0.0151946	0.0259492	0.0245939	0.0210508
1442	3.54e-05	0.009121	-0.01456	0.0197454	0.0170615	0.0258961	0.0276654	0.0130569	0.0219392
1462	-0.0021	0.006881	-0.00635	0.0241385	0.01642	0.0240615	0.0295769	0.0181115	0.0278992
1482	0.000331	-0.00037	-0.00206	0.0230415	0.0328931	0.02485	0.0278223	0.0147877	0.0271038
1502	0.005067	0.000308	0.004337	0.0254785	0.0155069	0.0228854	0.0330077	0.0232385	0.0227908
1522	-0.00109	0.004961	-0.00818	0.0225608	0.0242908	0.0210162	0.0232146	0.0258669	0.0221169
1542	-0.01291	0.008617	0.009317	0.0216039	0.0242908	0.0251846	0.0262046	0.0228908	0.02469
1562	-0.00744	-0.00334	-0.01092	0.0226092	0.0250531	0.0227331	0.0237538	0.0190177	0.0242969
1582	-0.01055	0.000419	-0.00052	0.0212808	0.0273169	0.0224623	0.0210677	0.0199423	0.0186085
1602	-0.00367	-0.00135	-0.00365	0.0207208	0.0316408	0.0177585	0.0319492	0.0233761	0.0226877
1622	0.003579	-0.00219	-0.002	0.0220669	0.03109	0.0271961	0.0261846	0.0183677	0.0220239
1642	-0.00124	0.004961	0.001414	0.0252169	0.02869	0.0249439	0.0252631	0.0169208	0.0259531
1662	-0.00758	-0.00405	0.000782	0.0220977	0.03198	0.0268785	0.0236846	0.0210777	0.0191608
1682	-0.00364	0.011867	0.001232	0.0201846	0.0283354	0.0268254	0.0238615	0.0233854	0.0195346
1702	-0.00772	0.004985	0.009692	0.0179	0.0332177	0.0217331	0.0233715	0.0242277	0.0242315
1722	-0.00356	0.009121	0.008739	0.0171869	0.0247061	0.0213569	0.0350077	0.0189261	0.0246054
1742	-0.01893	-0.00952	-0.00146	0.0214823	0.0222154	0.0246554	0.0263515	0.0267092	0.0268139
1762	-0.00085	0.004235	0.002667	0.0280069	0.0232646	0.0269023	0.0265577	0.0250239	0.0310515
1782	-0.00802	0.00208	-0.00296	0.0167238	0.0271508	0.0253146	0.0354492	0.0220208	0.0245308
1802	-0.00967	0.001071	-0.00486	0.0220061	0.0284108	0.0278308	0.0297631	0.0200338	0.0330069
1822	-0.0146	0.004468	0.00106	0.0141408	0.0277923	0.0250438	0.0267239	0.0235685	0.0265608
1842	-0.00132	0.003311	-0.00089	0.0147438	0.0332708	0.0271723	0.0367723	0.0227169	0.0282077
1862	0.001665	-0.00247	-0.00056	0.0204708	0.0320631	0.02592	0.0337331	0.0242731	0.0297792
1882	-0.00333	-0.00202	-0.0094	0.02136	0.0308862	0.0293539	0.0363215	0.0237608	0.0301346
1902	-0.00116	-0.00453	-0.01502	0.0186369	0.0346438	0.0204046	0.0295869	0.0289154	0.0271692
1922	-0.01135	0.006278	-0.00761	0.0226031	0.0393077	0.0291777	0.0234985	0.0273039	0.0242692
1942	-1.2e-05	-0.00826	-0.01089	0.0268131	0.02906	0.0268023	0.0342531	0.0294008	0.0246246
1962	-0.00471	-0.00334	-0.00602	0.0237669	0.03189	0.0246615	0.0315377	0.0186877	0.0179723
1982	0.003968	0.00229	-0.01649	0.0219331	0.0311123	0.0249615	0.0359	0.0254177	0.0286377
2002	-0.00048	0.002684	-0.01552	0.0233585	0.0314592	0.0283485	0.0360177	0.0180015	0.0243346
2022	-0.0028	0.007017	-0.00643	0.0172908	0.0389077	0.0290308	0.0312823	0.0271115	0.0298261
2042	-0.00237	-0.00084	-0.01128	0.0241385	0.0395492	0.0296423	0.0294592	0.0260954	0.0309023
2062	-0.0087	-0.00539	0.001146	0.0237177	0.0392392	0.0333231	0.0366254	0.0234769	0.0277115
2082	0.002634	0.000283	0.001735	0.02122	0.0364323	0.0288662	0.0308215	0.0310946	0.0395938
2102	0.005563	-0.00711	-0.00187	0.0241323	0.0362138	0.0276192	0.0329785	0.0197777	0.0332315
2122	0.015236	0.008358	-0.00525	0.0187408	0.0310146	0.0354577	0.0307731	0.03006	0.0270285
2142	-0.00178	-0.00475	-0.01661	0.0207208	0.0402885	0.0265554	0.0345277	0.0223869	0.0274592
2162	-0.00276	-0.0067	-0.00689	0.0226339	0.0350592	0.0260377	0.0321554	0.0226162	0.0251485
2182	-0.00879	-0.00441	0.002495	0.0203123	0.0345531	0.0275723	0.0310277	0.0300969	0.0306123
2202	-0.0067	0.000739	0.000353	0.0221339	0.0349462	0.0242085	0.0331938	0.0223415	0.0297423
2222	-0.00086	-0.00554	-0.00691	0.0196362	0.0371492	0.0261431	0.02242	0.0249877	0.0265046
2242	0.006815	0.004284	0.000514	0.0271485	0.0337162	0.0340054	0.0393015	0.0241454	0.0229685
2262	-0.00063	-0.00239	-0.00192	0.0253146	0.0377908	0.0257669	0.0415269	0.0270385	0.0299946
2282	-0.00599	0.000345	0.001596	0.0231331	0.0401754	0.0317	0.0361061	0.0331369	0.0323992
2302	0.002646	0.010229	0.001778	0.0255277	0.0396092	0.0318823	0.0438408	0.0260408	0.0338115
2322	-0.00516	0.0121	0.013622	0.0297923	0.0411338	0.0317885	0.0360669	0.0269377	0.0371708
2342	0.000142	0.004148	0.007753	0.0226092	0.0403485	0.0340931	0.0328023	0.0292361	0.0269261
2362	-0.00045	-0.00438	0.007893	0.0215062	0.0470192	0.0357338	0.0348315	0.0220854	0.0264954
2382	0.011433	-0.00145	-0.00102	0.0226638	0.0340931	0.0302538	0.0380177	0.02789	0.0355423
2402	0.000921	0.002253	0.001017	0.0195446	0.0318823	0.0360808	0.0287823	0.0299961	0.0272346
2422	0.003295	0.006893	-0.0051	0.0219569	0.0442654	0.0251085	0.0304785	0.0245115	0.0289838
2442	0.003661	0.004653	0.005815	0.0226638	0.0503323	0.0353692	0.0245669	0.0268923	0.0368708
2462	0.004216	0.002708	0.001039	0.0258385	0.04748	0.0352108	0.0280377	0.0298585	0.0366
2482	-0.00501	0.001551	0.005847	0.0227308	0.0443561	0.0353639	0.0332823	0.0283846	0.0292646
2502	0.001146	0.013454	0.00589	0.0220792	0.0348177	0.0365985	0.0420862	0.0288792	0.0346631
2522	0.003236	0.008186	0.00227	0.0229261	0.0343346	0.0321585	0.0281061	0.0286869	0.0377692
2542	0.011067	0.013614	-0.00362	0.0244062	0.0420092	0.0371985	0.03589	0.0252161	0.0347846
2562	-0.00733	0.006463	-0.00757	0.02501	0.0411031	0.0386092	0.0384	0.0281377	0.0347662
2582	0.004205	-0.00154	-0.00346	0.0251923	0.0440769	0.0321354	0.0382431	0.0334023	0.0360762
2602	-0.00032	0.002327	-0.00295	0.0249061	0.0500908	0.0331	0.0369785	0.0355723	0.0366931
2622	0.00098	0.0065	0.00302	0.0179546	0.0440538	0.0375508	0.0373708	0.0320654	0.0312485
2642	-0.0036	-0.00252	0.004787	0.0232369	0.0371492	0.0376508	0.0304785	0.03104	0.03079
2662	-0.00209	-0.0049	0.002442	0.02702	0.0469746	0.0343815	0.0363608	0.0299592	0.0327638
2682	0.000543	-0.00387	-0.00568	0.0207754	0.0500154	0.0398854	0.0312431	0.0304169	0.0315192
2702	0.006921	0.00565	0.005515	0.0287261	0.04296	0.03477	0.0321162	0.0302338	0.0275154
2722
2742
2762
2782
2802
2822
2842
2862
2882
2902
2922
2942
2962
2982
3002

## Sheet: 5J
	no Syx1	add. Syx1	add. Rph3A FL
	-0.00501	0.0353639	0.0292646
	0.005847	0.0227308	0.0332823
	0.001551	0.0348177	0.0283846
Mean	0.000796	0.0309708	0.0303105
SD	0.00546774	0.00714127	0.00261099
SEM	0.0031568	0.00412302	0.00150746
