# Supplementary material for: Rabphilin 3A binds the N-peptide of SNAP-25 to promote SNARE complex assembly in exocytosis
Source: eLife. 2022 Sep 29;11:e79926. doi: 10.7554/eLife.79926 (PMC9522249; doi:10.7554/eLife.79926)
Supplement: Figure 6—figure supplement 2—source data 1. [file elife-79926-fig6-figsupp2-data1.xlsx]

## Sheet: 6C
	control	add. Syx1/Syb2	add. Rph3A FL	add. Rph3-K3
	0.971592	0.868059	0.805011	0.949303
	1.01265	0.792918	0.817105	0.966007
	1.01576	0.830488	0.826698	0.957655
Mean	1	0.830488	0.816271	0.957655
SD	0.024651	0.0375703	0.0108675	0.00835205
SEM	0.0142323	0.0216912	0.00627433	0.00482206

## Sheet: 6F
	control	add. Syx1/Syb2	add. Rph3A FL
	0.955619	0.752871	1.07104
	0.954602	0.823949	1.03891
	1.08978	0.850866	0.909458
			1.05137
Mean	1	0.809229	1.0177
SD	0.0777526	0.0506292	0.0733617
SEM	0.0448905	0.0292308	0.0366808

## Sheet: 1A
	SN25 R59C	SN25 E55W/R59C
	0.960199	0.551129
	0.999799	0.548782
	1.04	0.51523
Mean	1	0.53838
SD	0.039902	0.020083
SEM	0.0230374	0.0115949

## Sheet: 1B
	SN25 11-206 R59C	SN25 11-206 E55W/R59C
	1.04901	0.507997
	1.01555	0.481667
	0.919439	0.563176
	1.016
Mean	1	0.517613
SD	0.055945	0.0415968
SEM	0.0279725	0.0240159
