# Supplementary material for: Rabphilin 3A binds the N-peptide of SNAP-25 to promote SNARE complex assembly in exocytosis
Source: eLife. 2022 Sep 29;11:e79926. doi: 10.7554/eLife.79926 (PMC9522249; doi:10.7554/eLife.79926)
Supplement: Figure 6—source data 1. [file elife-79926-fig6-data1.xlsx]

## Sheet: 5C
	no Syx1	add. Syx1	add. Rph3A FL	add. Rph3A K4	add. Rph3A K3
	0.0262836	0.184535	0.37546	0.297574	0.146421
	0.09422	0.213763	0.323497	0.322625	0.150974
	0.034426	0.168561	0.340841	0.310099	0.131773
Mean	0.0516432	0.188953	0.346599	0.310099	0.143056
SD	0.0370967	0.0229225	0.0264558	0.0125255	0.0100332
SEM	0.0214178	0.0132343	0.0152743	0.00723157	0.00579266

## Sheet: 5E
	SN25 11-206			SN25 1-206
	no Syx1	add. Syx1	add. Rph3A FL	add. Rph3A FL
	0.0364469	0.217606	0.170567	0.37546
	0.0715441	0.167789	0.192908	0.323497
	0.0203714	0.21412	0.178354	0.340841
Mean	0.0427875	0.199839	0.18061	0.346599
SD	0.0261689	0.02781	0.0113399	0.0264558
SEM	0.0151086	0.0160561	0.0065471	0.0152743

## Sheet: 6C
	control	add. Syx1/Syb2	add. Rph3A FL	add. Rph3-K3
	0.971592	0.868059	0.805011	0.949303
	1.01265	0.792918	0.817105	0.966007
	1.01576	0.830488	0.826698	0.957655
Mean	1	0.830488	0.816271	0.957655
SD	0.024651	0.0375703	0.0108675	0.00835205
SEM	0.0142323	0.0216912	0.00627433	0.00482206

## Sheet: 6F
	control	add. Syx1/Syb2	add. Rph3A FL
	0.955619	0.752871	1.07104
	0.954602	0.823949	1.03891
	1.08978	0.850866	0.909458
			1.05137
Mean	1	0.809229	1.0177
SD	0.0777526	0.0506292	0.0733617
SEM	0.0448905	0.0292308	0.0366808
